# Supplementary material for: Mycobacterium tuberculosis suppresses host antimicrobial peptides by dehydrogenating L-alanine
Source: Nat Commun. 2024 May 17;15:4216. doi: 10.1038/s41467-024-48588-4 (PMC11101664; doi:10.1038/s41467-024-48588-4)
Supplement: Supplementary file 10 — Supplementary Data 7 [file 41467_2024_48588_MOESM10_ESM.xlsx]

## Sheet: Sheet1
Supplementary Table 5. Preliminary pharmacokinetic (PK) evaluation of GWP-042 in mice.a
Admin	Dosage	T1/2	Tmax	Cmax	AUC(0-t)	AUC(0-∞）	MRT(0-t)	MRT(0-∞）	Vss	Cl	F
Route	（mg/kg）	（h）	（h）	（ng/mL）	（h*ng/mL）	（h*ng/mL）	（h）	（h）	（L/kg)	(mL/min/kg)	(%)
i.v	10	2.1±1.7	0.7±0.3	7237.5±106.8	19308.2±2052.4	19331.7±2040.7	1.7±0.1	1.7±0.2	0.9±0.1	8.7±0.9
p.o	100	2.3±0.1	1±0.0	45425.2±9627.0	155989.5±46274.3	156121.8±46303.3	2.7±0.3	2.8±0.3			80.8±24.0
a. The value of mice represented the results (mean ± SD) from three independent experiments.
