# Supplementary material for: Mycobacterium tuberculosis suppresses host antimicrobial peptides by dehydrogenating L-alanine
Source: Nat Commun. 2024 May 17;15:4216. doi: 10.1038/s41467-024-48588-4 (PMC11101664; doi:10.1038/s41467-024-48588-4)
Supplement: Supplementary file 11 — Supplementary Data 8 [file 41467_2024_48588_MOESM11_ESM.xlsx]

## Sheet: Sheet1
Supplementary Table 6. In vivo toxicity study of GWP-042.
Study	Admin Route	Species	Dosage	Number of animals	Frequency	Results
Acute toxicity	p.o	C57BL/6 mice	50 mg/kg	Three mice for 50 mg/kg	Single dose	No mice died after receiving 50 or 200 mg/kg, and two mice died after receiving 1000 mg/kg.
			200 mg/kg	Three mice for 200 mg/kg
			1000 mg/kg	Three mice for 1000 mg/kg
